# Supplementary material for: An Analysis of the Deleterious Impact of the Infodemic during the COVID-19 Pandemic in Brazil: A Case Study Considering Possible Correlations with Socioeconomic Aspects of Brazilian Demography
Source: MDPI journal article supplement (doi:10.3390/ijerph19063208), 2022-03-09
Supplement: s1 [file s1]

Supplementary Materials S2: Generated dendrograms on cluster-based multivalued analysis

First Scenario – Infodemic and variables that illustrate social inequality

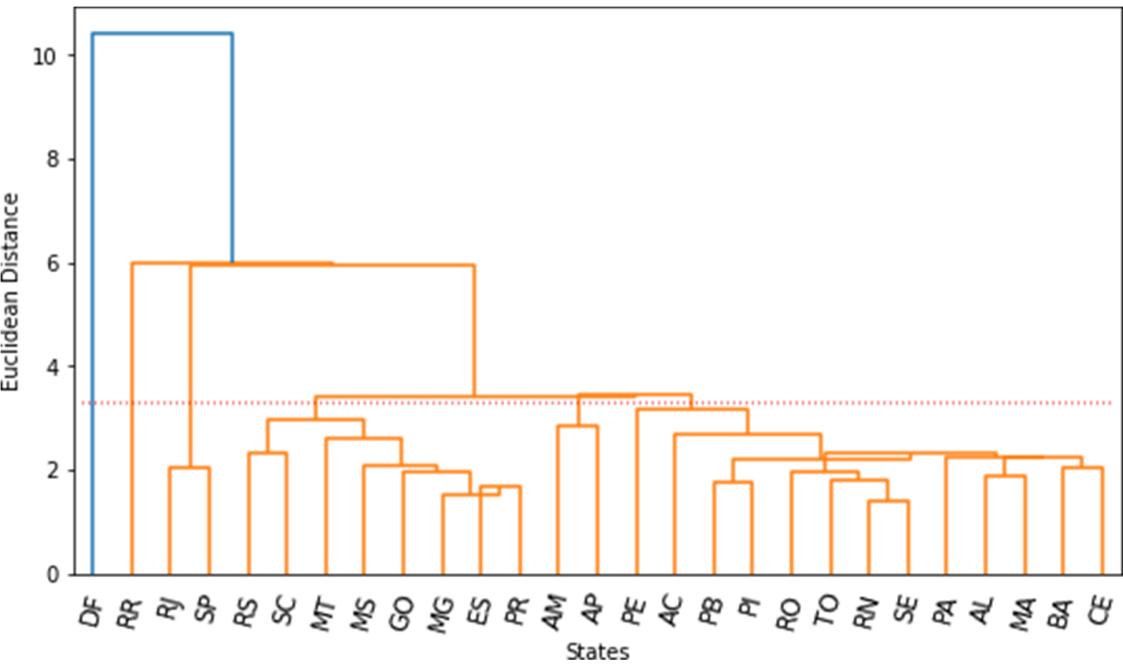

Figure S3. Dendrogram – 1 PQ - First Scenario.

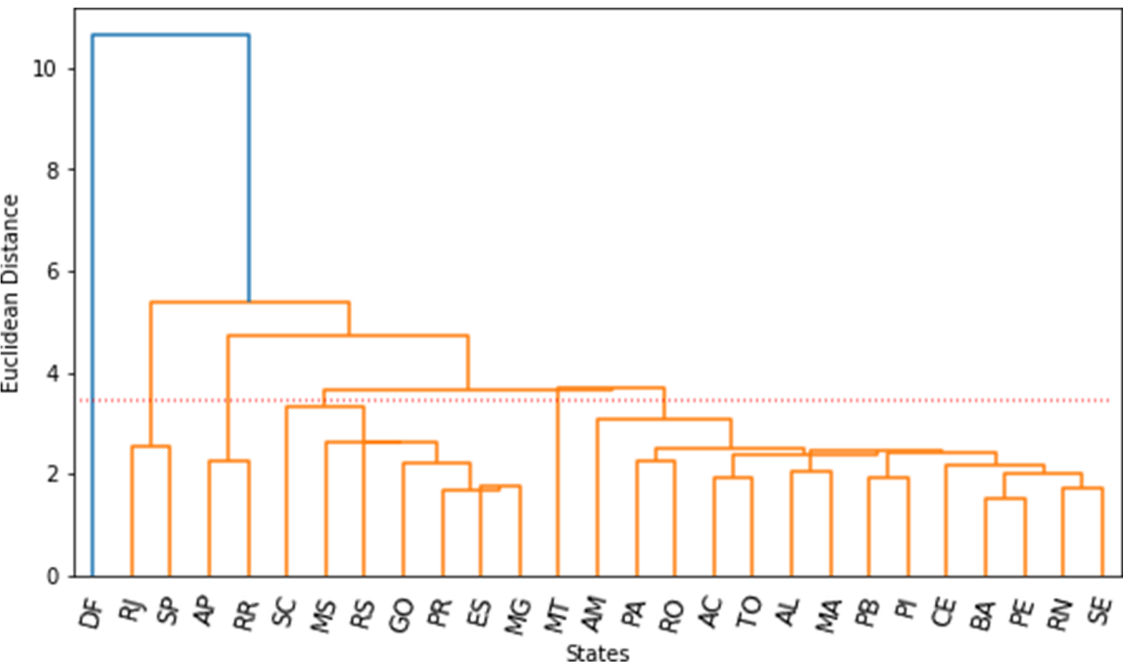

Figure S4. Dendrogram – 2 PQ - First Scenario.

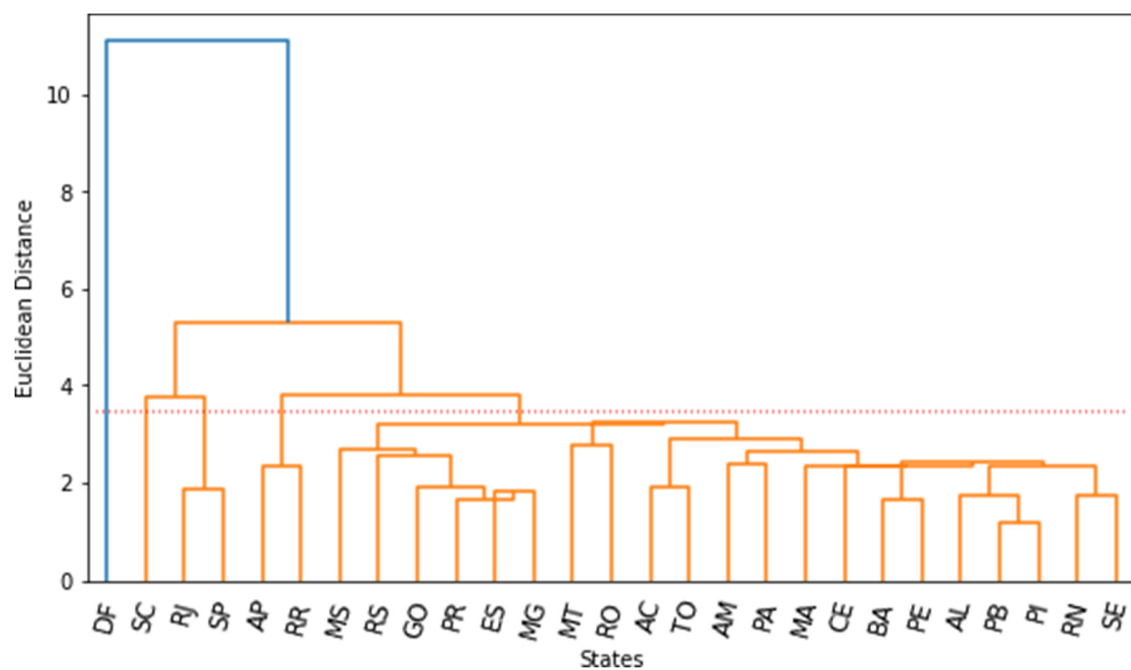

Figure S5. Dendrogram – 3 PQ - First Scenario.

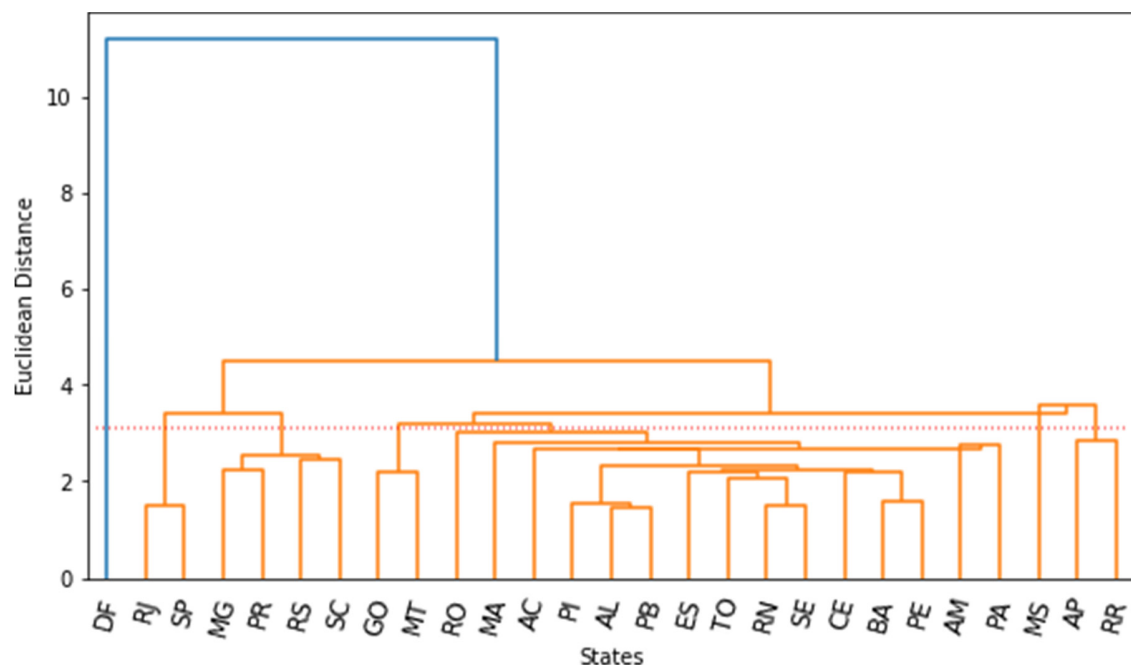

Figure S6. Dendrogram – 4 PQ - First Scenario.

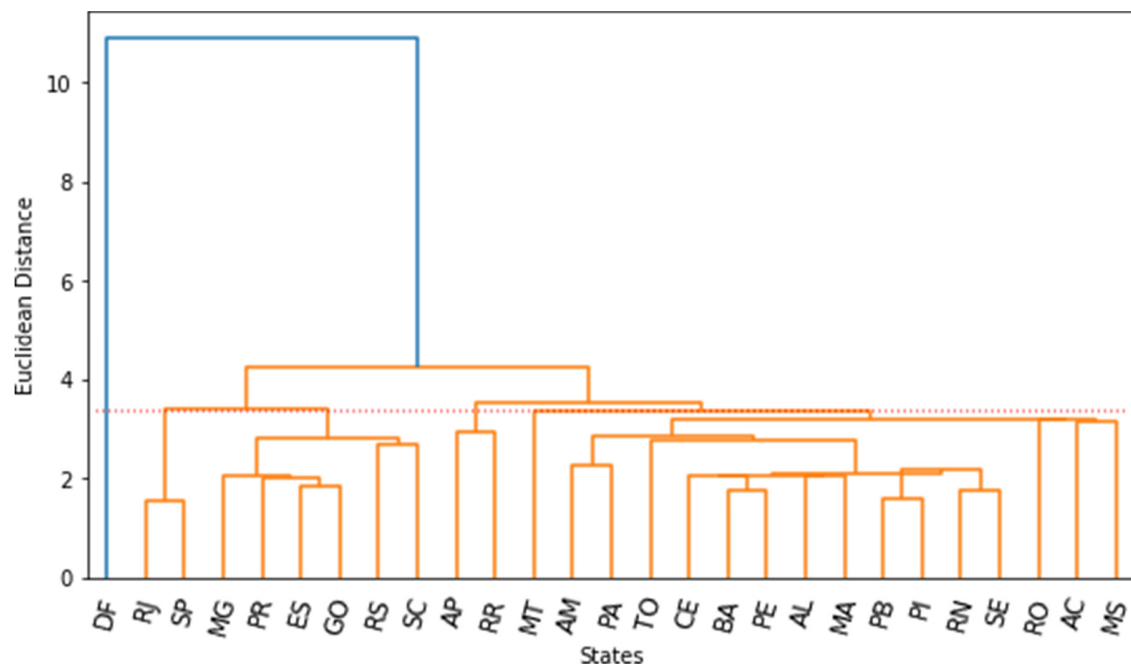

**Figure S7.** Dendrogram – 5 PQ - First Scenario.

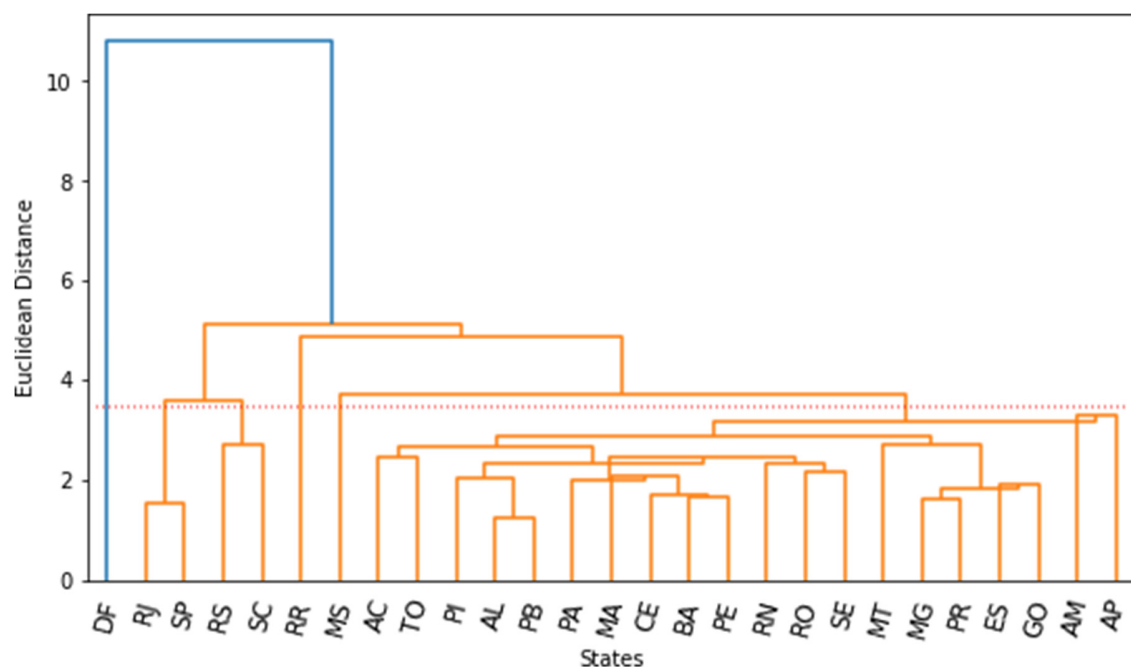

**Figure S8.** Dendrogram – 6 PQ - First Scenario.

## Second Scenario – Infodemic and Impact of social programs

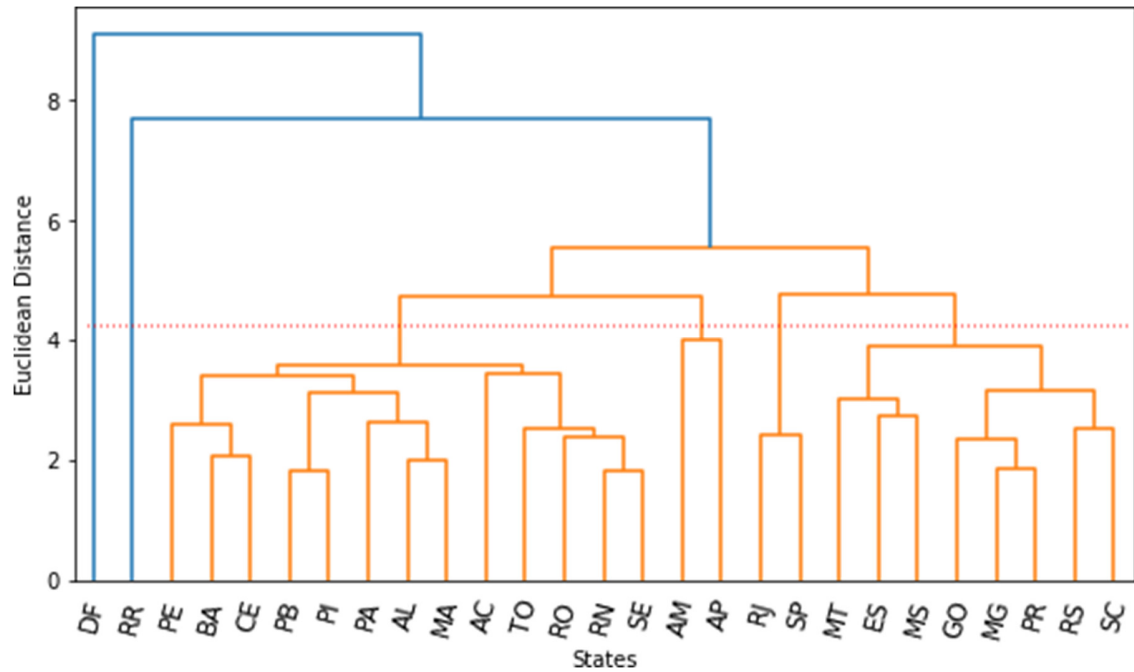

Figure S9. Dendrogram – 1 PQ - Second Scenario.

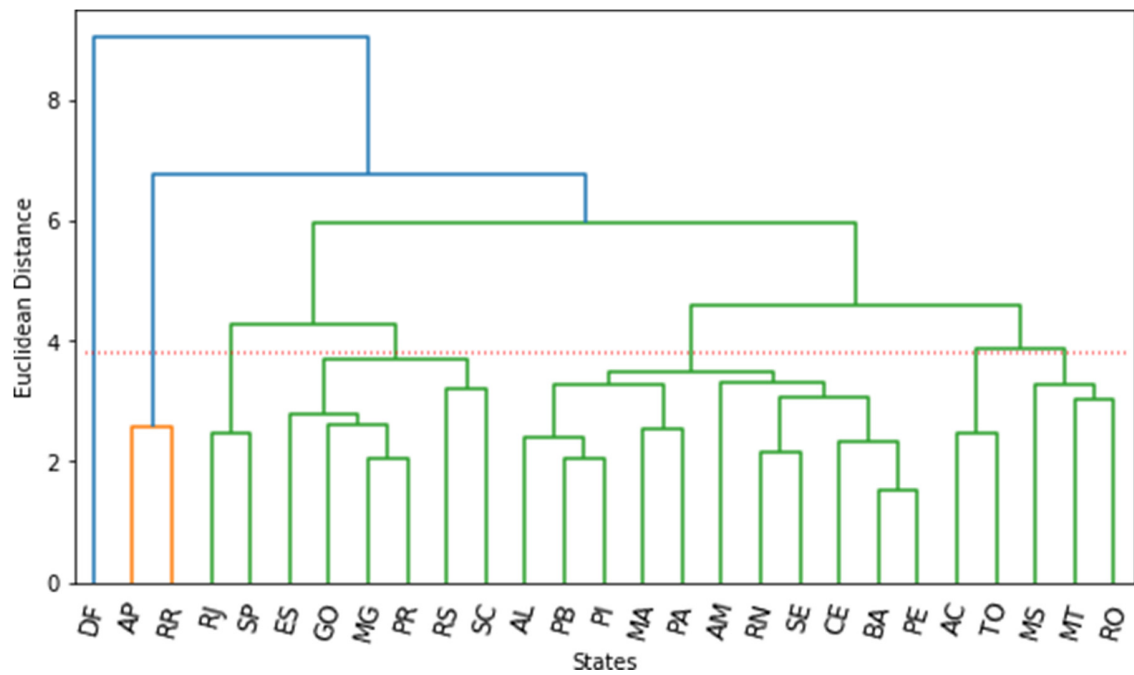

Figure S10. Dendrogram – 2 PQ - Second Scenario.

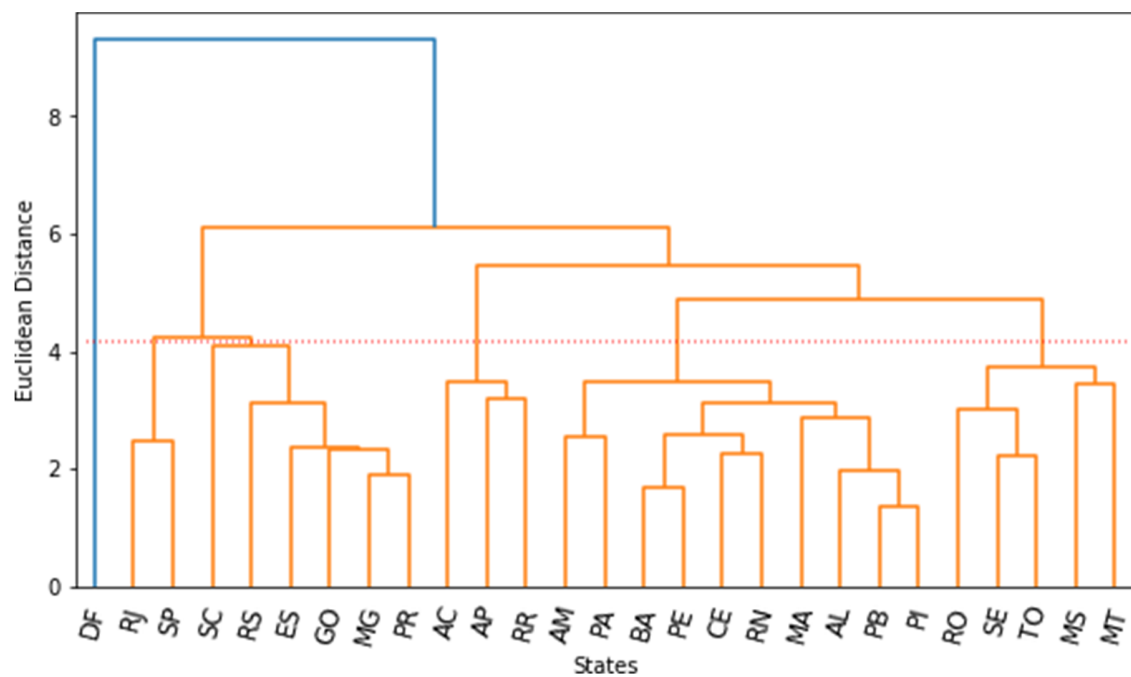

**Figure S11.** Dendrogram – 3 PQ - Second Scenario.

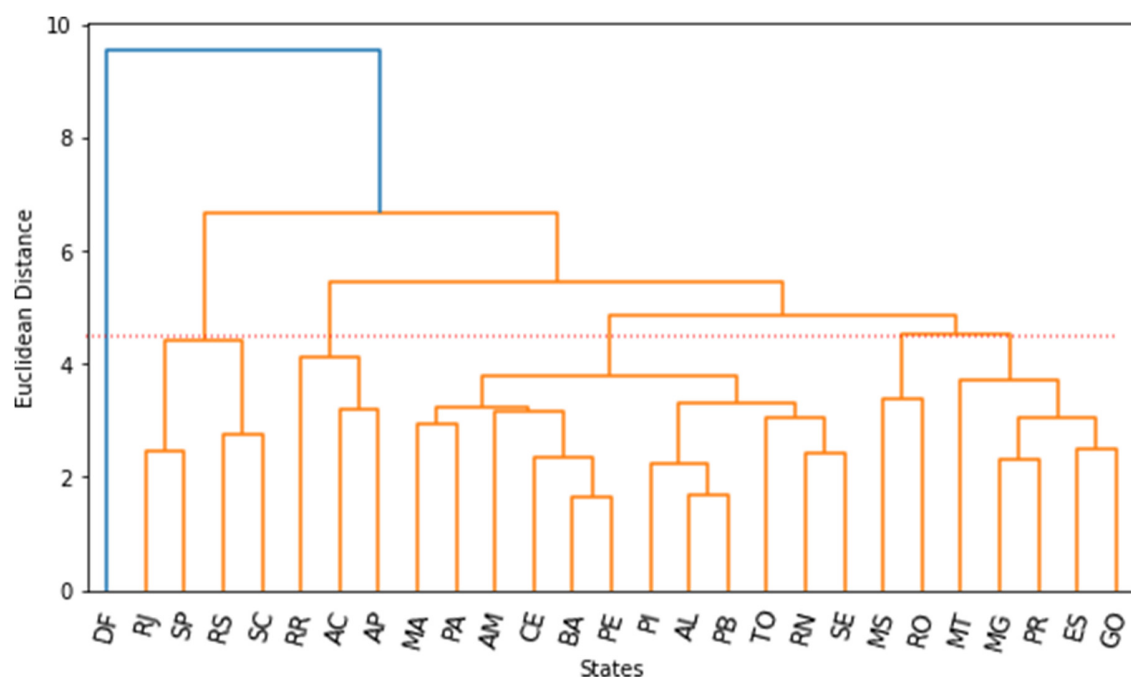

**Figure S12.** Dendrogram – 4 PQ - Second Scenario.

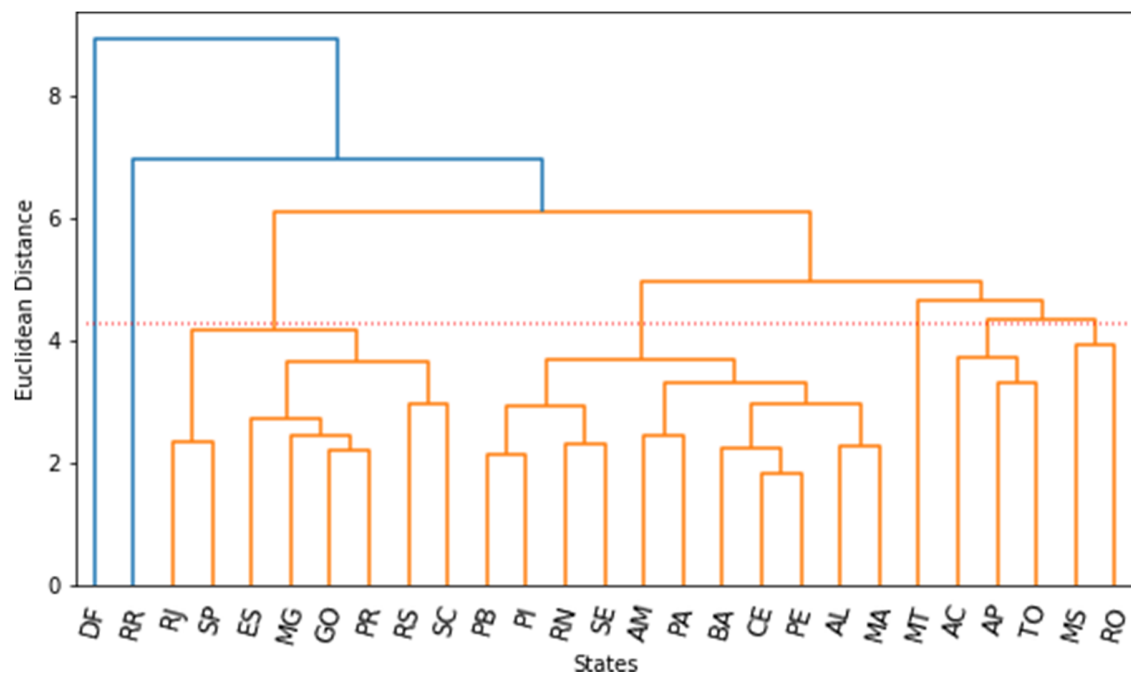

Figure S13. Dendrogram – 5 PQ - Second Scenario.

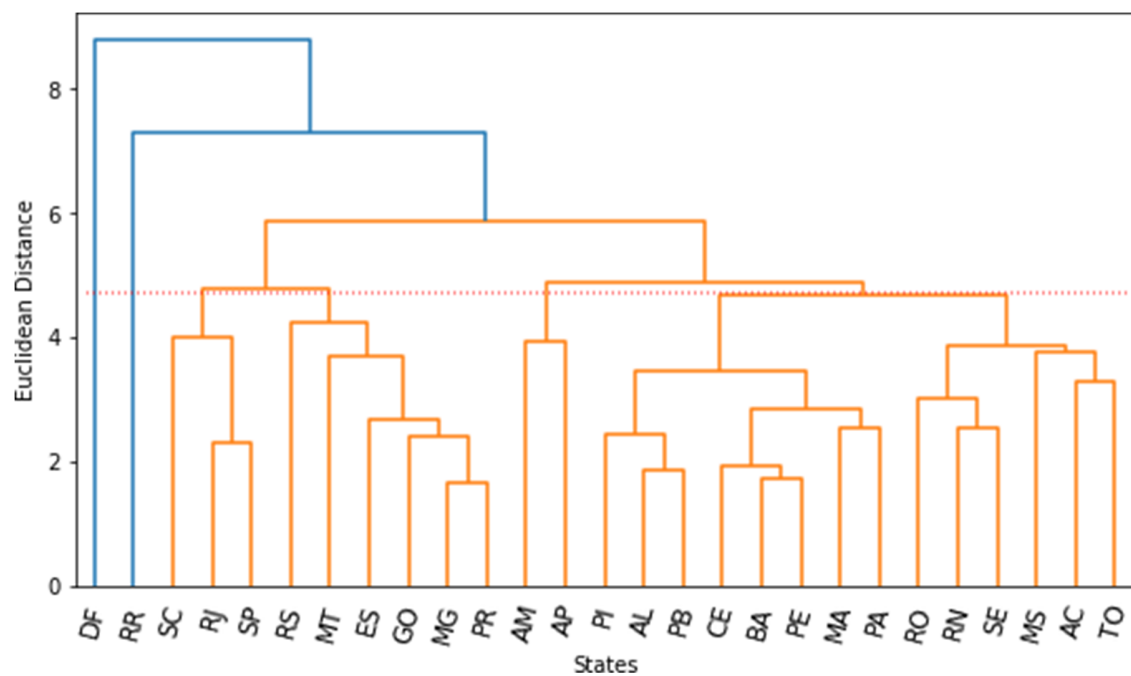

Figure S14. Dendrogram – 6 PQ - Second Scenario.

### Third Scenario – Infodemic and Public Influences

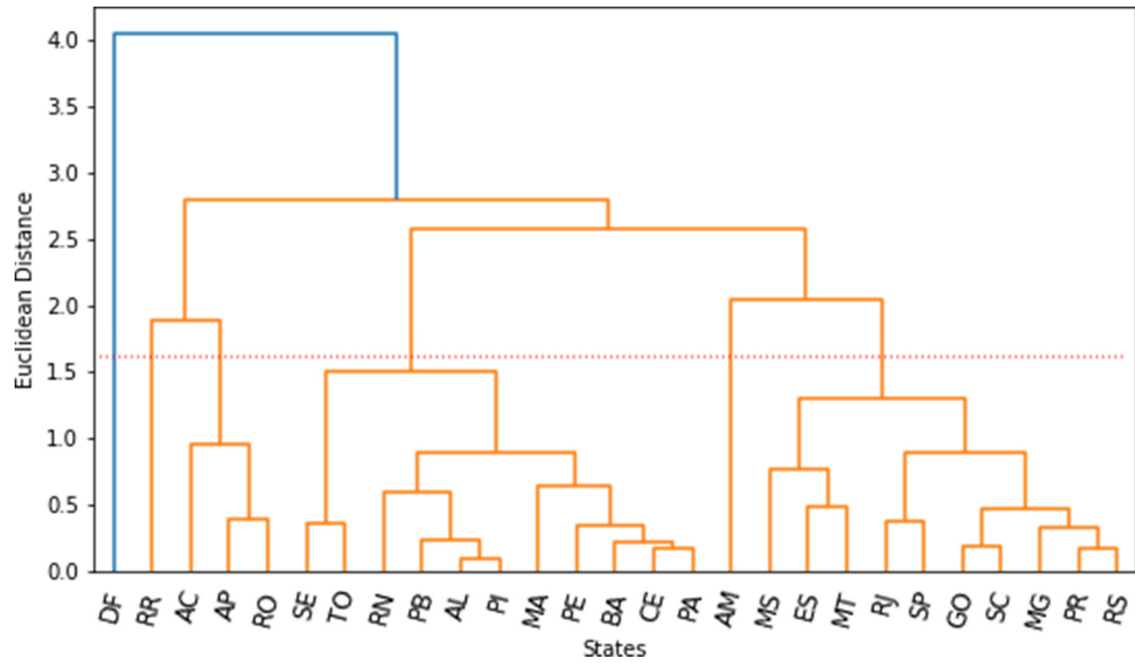

Figure S15. Dendrogram - Third Scenario.
